# Supplementary material
Source: Springer Nature journal article supplement (https://www.springermedizin.de/resource/supplementary/13046_2008_59_MOESM3_ESM.pdf/9661428)

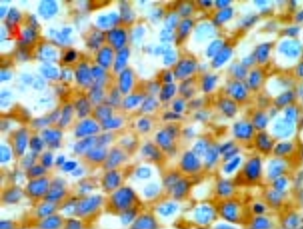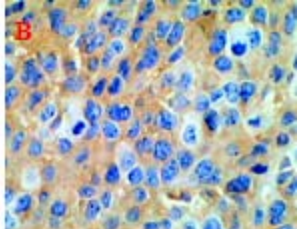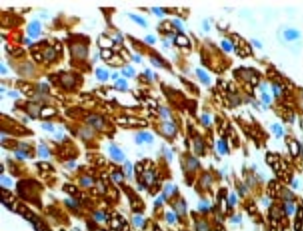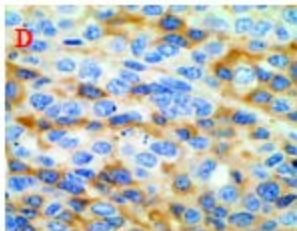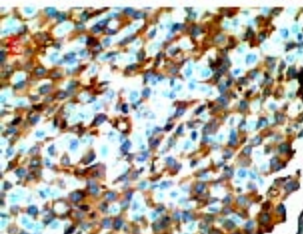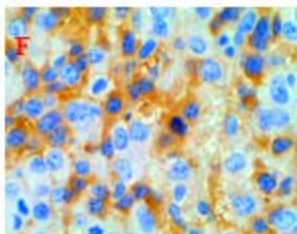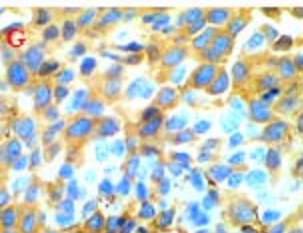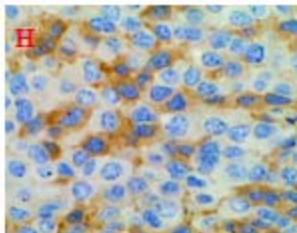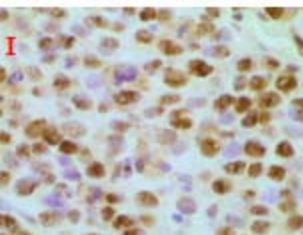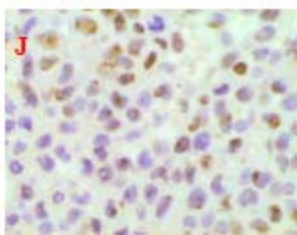

Supplement: MOESM3 [file 9661428]
